# Supplementary material
Source: Springer Nature journal article supplement (https://www.springermedizin.de/resource/supplementary/12885_2010_2757_MOESM8_ESM.pdf/9461814)

**A. Miller 2005: WGCNA\* (ATP1B1,TP53,TGFBR2 = 1, 1, 2), p=0.049**

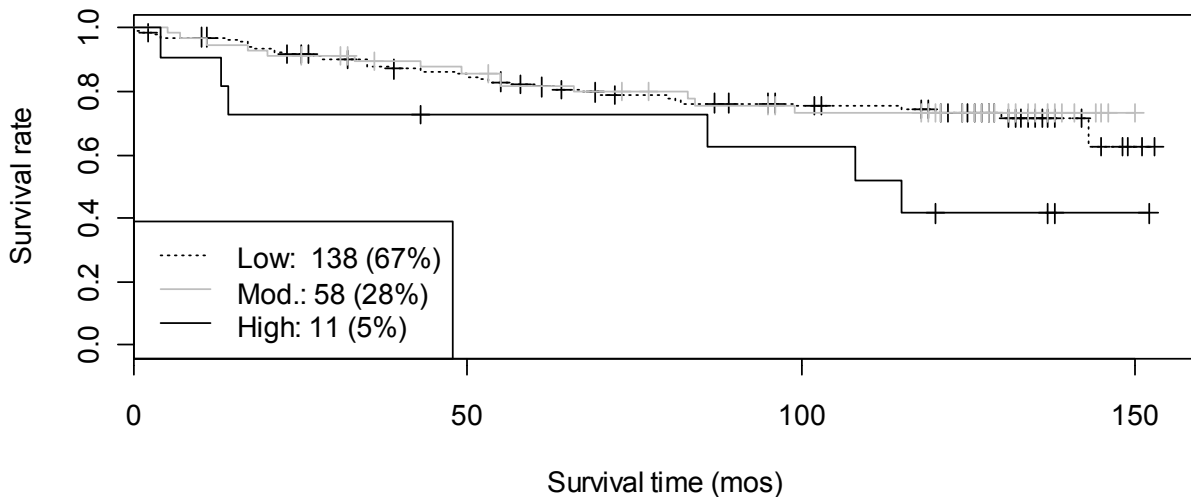

**B. Pawitan 2005: WGCNA\* (ATP1B1,TP53,TGFBR2 = 1, 2, 1), p=0.001**

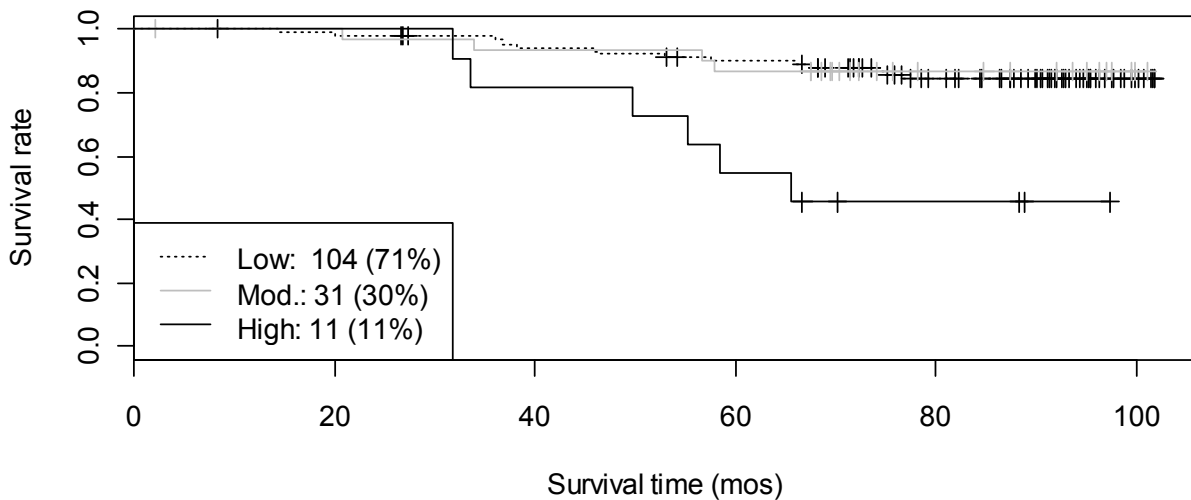

Supplement: MOESM8 [file 9461814]
